# Supplementary material
Source: PubMed Central journal article supplement (PMC2933821)
Supplement: NIHMS31746-supplement-1.pdf [file NIHMS31746-supplement-1.pdf]

# **Synthesis, characterisation and photochemistry of Pt<sup>IV</sup> pyridyl azido complexes**

Fiona S. Mackay<sup>a</sup>, Nicola J. Farrer<sup>b</sup>, Luca Salassa<sup>b</sup>, Hui-Chung Tai<sup>b</sup>, Robert J. Deeth<sup>b</sup>,  
Stephen A. Moggach<sup>a</sup>, Peter A. Wood<sup>a</sup>, Simon Parsons<sup>a</sup>, Peter J. Sadler<sup>\*b</sup>

<sup>a</sup>*School of Chemistry, University of Edinburgh, West Mains Road, Edinburgh EH9  
3JJ, UK*

<sup>b</sup>*Department of Chemistry, University of Warwick, Coventry, CV4 7AL, UK.*

*Email: [p.j.sadler@warwick.ac.uk](mailto:p.j.sadler@warwick.ac.uk).*

## **Supplementary Information**

**Tables S1 – S11**

**Figures S1 – S10**

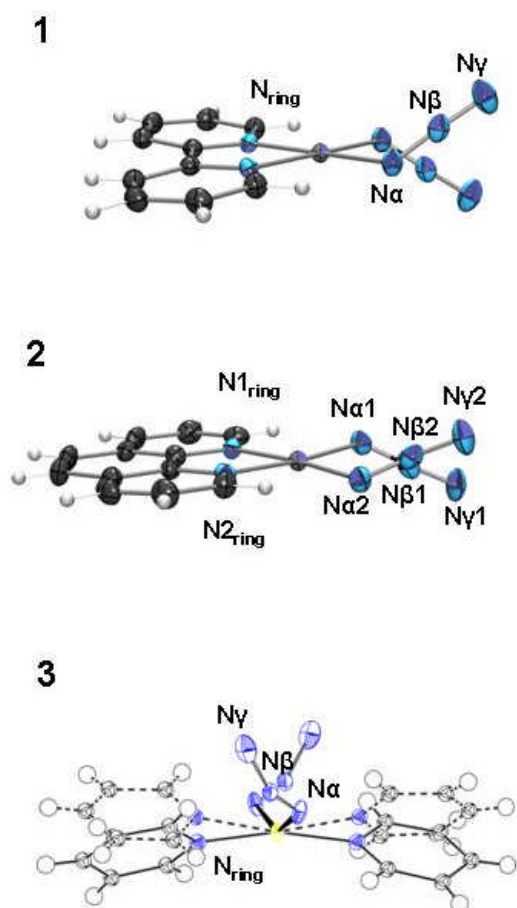

**Figure S1.** ORTEP plots of  $[\text{Pt}(\text{bpy})(\text{N}_3)_2]$  (**1**) and  $[\text{Pt}(\text{phen})(\text{N}_3)_2]$  (**2**). PLATON<sup>1</sup> was used to generate the plot for  $[\text{Pt}(\text{py})_2(\text{N}_3)_2]$  (**3**). Non-hydrogen atoms are represented by Gaussian ellipsoids at the 50% probability level. Hydrogen atoms are shown with arbitrarily small thermal parameters.

<sup>1</sup> A. L. Spek, *J. Appl. Cryst.*, 2003, **36**, 7-13.

**Table S1. Selected X-ray bond distances (Å).** For all complexes except **2**; N1 = N2 = N<sub>ring</sub>; N<sub>(α1)</sub> = N<sub>(α2)</sub>, N<sub>(β1)</sub> = N<sub>(β2)</sub>, N<sub>(γ1)</sub> = N<sub>(γ2)</sub>. O1 and O2 are the axially-coordinated oxygens.

| Bond                                 | Complex |       |        |          |       |       |
|--------------------------------------|---------|-------|--------|----------|-------|-------|
|                                      | 1       | 2     | 3      | 4        | 5     | 6     |
| Pt–N1                                | 2.009   | 2.011 | 1.992* | 2.033(3) | 2.051 | 2.028 |
| Pt–N2                                | 2.009   | 2.012 | 1.992* | 2.033(3) | 2.051 | 2.028 |
| Pt–N <sub>(α1)</sub>                 | 2.034   | 2.037 | 2.036  | 2.022(3) | 2.033 | 2.049 |
| Pt–N <sub>(α2)</sub>                 | 2.034   | 2.022 | 2.036  | 2.022(3) | 2.033 | 2.049 |
| N <sub>(α1)</sub> –N <sub>(β1)</sub> | 1.191   | 1.182 | 1.188  | 1.225    | 1.174 | 1.224 |
| N <sub>(β1)</sub> –N <sub>(γ1)</sub> | 1.148   | 1.164 | 1.520  | 1.148    | 1.155 | 1.142 |
| N <sub>(α2)</sub> –N <sub>(β2)</sub> | 1.191   | 1.179 | 1.188  | 1.225    | 1.174 | 1.224 |
| N <sub>(β2)</sub> –N <sub>(γ2)</sub> | 1.148   | 1.167 | 1.520  | 1.148    | 1.155 | 1.142 |
| Pt–O1                                | -       | -     | -      | 2.020    | 2.001 | 2.007 |
| Pt–O2                                | -       | -     | -      | 2.020    | 2.001 | 2.007 |

\* disordered bond

**Table S2. Selected X-ray angles (°)**

| Angle                                                                   | Complex   |         |          |            |            |         |
|-------------------------------------------------------------------------|-----------|---------|----------|------------|------------|---------|
|                                                                         | 1         | 2       | 3        | 4          | 5          | 6       |
| N1–Pt–N2                                                                | 80.40(17) | 81.6(2) | 165.84*  | 80.07(17)  | 81.2(2)    | 179.994 |
| N <sub>(α1)</sub> –Pt–N <sub>(α2)</sub>                                 | 91.29(18) | 95.0(2) | 146.7(7) | 89.5(2)    | 96.1(2)    | 179.994 |
| Pt–N <sub>(α1)</sub> –N <sub>(β1)</sub> –N <sub>(γ1)</sub> <sup>†</sup> | 176.81    | 179.65  | -106.70  | 167.93     | 167.93     | 179.80  |
| N1–Pt–N <sub>(α1)</sub> –N <sub>(β1)</sub> <sup>†</sup>                 | -125.45   | -164.38 | -167.97* | 142.39     | 155.71     | 123.42  |
| N2–Pt–N <sub>(α2)</sub> –N <sub>(β2)</sub> <sup>†</sup>                 | -125.45   | -175.37 | -167.97* | 142.39     | 155.71     | 123.42  |
| Pt–N <sub>(α2)</sub> –N <sub>(β2)</sub> –N <sub>(γ2)</sub> <sup>†</sup> | 176.81    | 179.50  | -106.70  | 167.93     | 167.93     | 179.80  |
| O1–Pt–O2                                                                | -         | -       | -        | 179.18(14) | 165.12(19) | 179.994 |

\*Disordered bonds involved

<sup>†</sup> Torsion angle

**4:** N–Pt–N(bpy) = 80.07°

(Ac)CO···H–C contact 2.794 Å

**5:** N–Pt–N(phen) = 81.19°

### Description of crystal packing in **1**.

The two aromatic rings within a single molecule of the bpy complex **1** are skewed with respect to each other, at an angle of 5.12°. The centroid-centroid distance (4.036 Å) and angle (5.12°) indicate that  $\pi$ - $\pi$  stacking does not play a major role in the crystal packing of **1**. The structure of [Pt(phen)(N<sub>3</sub>)<sub>2</sub>] (**2**) consists of dimers which are  $\pi$ - $\pi$  stacked at a distance of 3.631 Å with a dihedral angle of 5.27°. The Pt...Pt distance is 3.341 Å; it is not unusual to find such Pt...Pt interactions in square-planar Pt<sup>II</sup> complexes, with linear chains being commonly reported.<sup>1,2</sup> The Pt...Pt distance is however considerably longer than that which is found in complexes with well-defined Pt-Pt bonds.<sup>3</sup>

**Table S3. Selected DFT bond distances (Å)**

| Bond                     | Complex |       |       |       |       |       |
|--------------------------|---------|-------|-------|-------|-------|-------|
|                          | 1       | 2     | 3     | 4     | 5     | 6     |
| Pt-N1                    | 2.064   | 2.074 | 2.063 | 2.105 | 2.118 | 2.076 |
| Pt-N2                    | 2.064   | 2.074 | 2.063 | 2.105 | 2.118 | 2.076 |
| Pt-N $\alpha$ 1          | 2.022   | 2.020 | 2.081 | 2.058 | 2.055 | 2.111 |
| Pt-N $\alpha$ 2          | 2.022   | 2.020 | 2.081 | 2.058 | 2.055 | 2.111 |
| N $\alpha$ 1-N $\beta$ 1 | 1.223   | 1.223 | 1.223 | 1.230 | 1.230 | 1.226 |
| N $\beta$ 1-N $\gamma$ 1 | 1.151   | 1.151 | 1.154 | 1.147 | 1.147 | 1.150 |
| N $\alpha$ 2-N $\beta$ 2 | 1.223   | 1.223 | 1.223 | 1.230 | 1.230 | 1.226 |
| N $\beta$ 2-N $\gamma$ 2 | 1.151   | 1.151 | 1.155 | 1.147 | 1.147 | 1.150 |
| Pt-O1                    | -       | -     | -     | 2.058 | 2.059 | 2.061 |
| Pt-O2                    | -       | -     | -     | 2.058 | 2.059 | 2.061 |

**Table S4. Selected DFT angles (°)**

| Angle                                    | Complex |         |         |         |         |         |
|------------------------------------------|---------|---------|---------|---------|---------|---------|
|                                          | 1       | 2       | 3       | 4       | 5       | 6       |
| N1-Pt-N2                                 | 79.17   | 79.97   | 177.98  | 78.60   | 79.06   | 180     |
| N $\alpha$ 1-Pt-N $\alpha$ 2             | 99.28   | 100.78  | 177.41  | 93.31   | 94.05   | 180     |
| Pt-N $\alpha$ 1-N $\beta$ 1-N $\gamma$ 1 | 176.16  | 176.76  | 173.44  | 178.32  | 179.16  | 169.97  |
| Pt-N $\alpha$ 2-N $\beta$ 2-N $\gamma$ 2 | 176.16  | 177.57  | 173.50  | -178.32 | -179.16 | -169.97 |
| N1-Pt-N $\alpha$ 1-N $\beta$ 1           | -162.16 | -166.64 | -141.51 | 133.43  | 136.12  | -77.09  |
| N2-Pt-N $\alpha$ 2-N $\beta$ 2           | -162.16 | -166.64 | -141.48 | 133.43  | 136.25  | 77.09   |
| O1-Pt-O2                                 | -       | -       | -       | 168.08  | 167.19  | 180     |

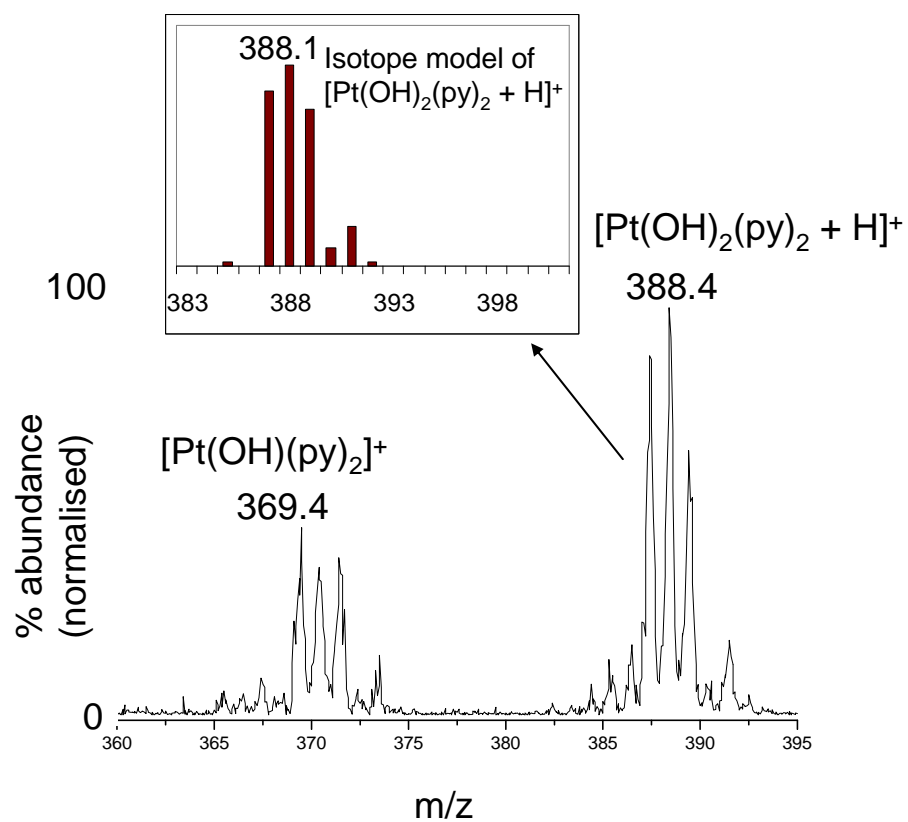

**Figure S2.** ESI-MS of compound **6** following UVA irradiation for 2 h showing species in which the py ligand is still attached but from which the acetate group has dissociated.

## Calculations with Gaussian

Figure S3: Theoretical UV-vis spectrum of 1

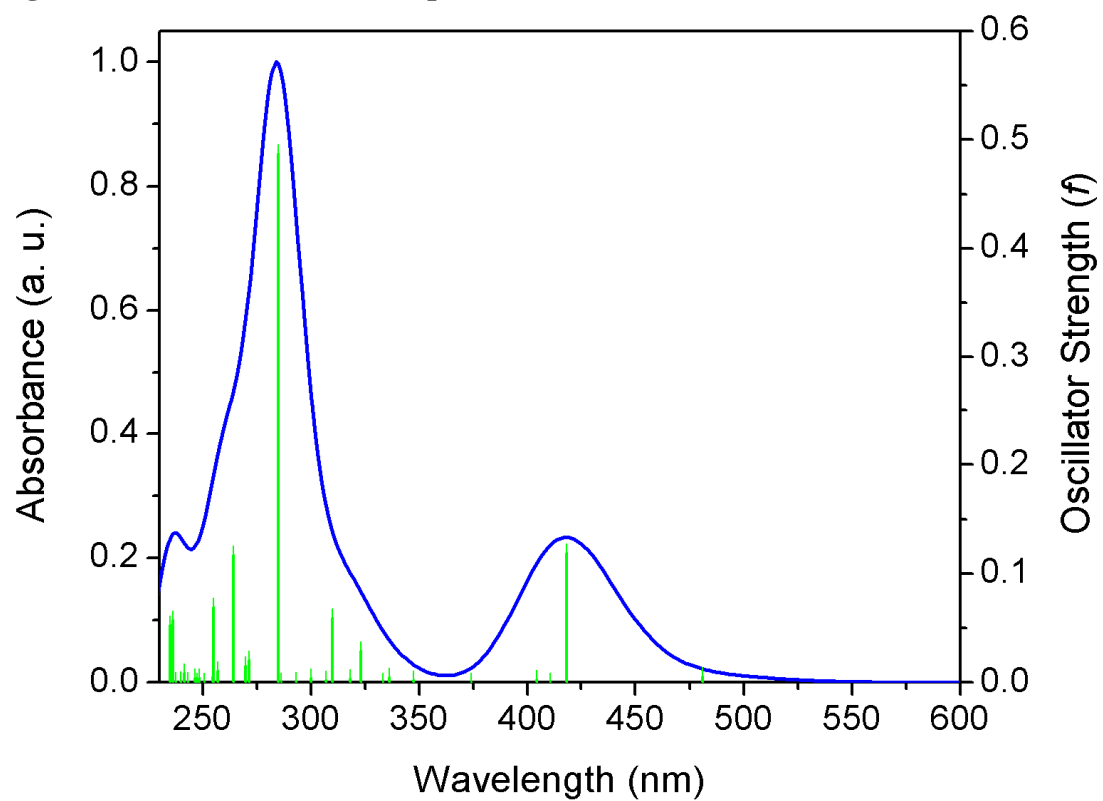

**Table S8: Complex 1, selected singlet transitions**

| <b>No.</b> | <b>Energy (eV)</b> | <b><math>\lambda</math> (nm)</b> | <b>Osc. Strength</b> | <b>Major contribs</b>                                   |
|------------|--------------------|----------------------------------|----------------------|---------------------------------------------------------|
| 1          | 2.5767             | 481.18                           | 0.0056               | HOMO->LUMO (96%)                                        |
| 2          | 2.9652             | 418.13                           | 0.1189               | H-1->LUMO (92%)                                         |
| 3          | 3.019              | 410.69                           | 0.0002               | H-2->LUMO (14%),<br>HOMO->L+2 (73%)<br>HOMO->L+1 (-5%)  |
| 4          | 3.0662             | 404.36                           | 0.0026               | H-2->LUMO (83%),<br>HOMO->L+2 (-12%)                    |
| 9          | 3.8372             | 323.11                           | 0.0288               | H-1->L+1 (16%),<br>HOMO->L+3 (79%)                      |
| 10         | 3.8951             | 318.31                           | 0.0036               | H-4->LUMO (93%)                                         |
| 11         | 4.0002             | 309.94                           | 0.0594               | H-1->L+1 (70%),<br>HOMO->L+3 (-17%)                     |
| 16         | 4.3527             | 284.85                           | 0.487                | H-5->LUMO (62%),<br>H-1->L+3 (-18%)                     |
| 17         | 4.5666             | 271.5                            | 0.0202               | H-6->LUMO (92%)                                         |
| 18         | 4.5934             | 269.92                           | 0.0152               | HOMO->L+6 (73%)                                         |
| 19         | 4.6943             | 264.12                           | 0.1168               | H-7->LUMO (71%),<br>H-4->L+2 (14%)                      |
| 20         | 4.8264             | 256.89                           | 0.0107               | H-6->L+2 (11%),<br>H-3->L+1 (-31%),<br>H-1->L+6 (32%)   |
| 21         | 4.8585             | 255.19                           | 0.0691               | H-7->LUMO (-16%),<br>H-4->L+2 (41%),<br>H-1->L+5 (-16%) |
| 31         | 5.2475             | 236.27                           | 0.0571               | H-5->L+1 (55%),<br>H-1->L+4 (-15%)                      |
| 32         | 5.2757             | 235.01                           | 0.0523               | H-6->L+2 (47%),<br>H-1->L+6 (-16%)                      |

Figure S4: Theoretical UV-vis spectrum of 2

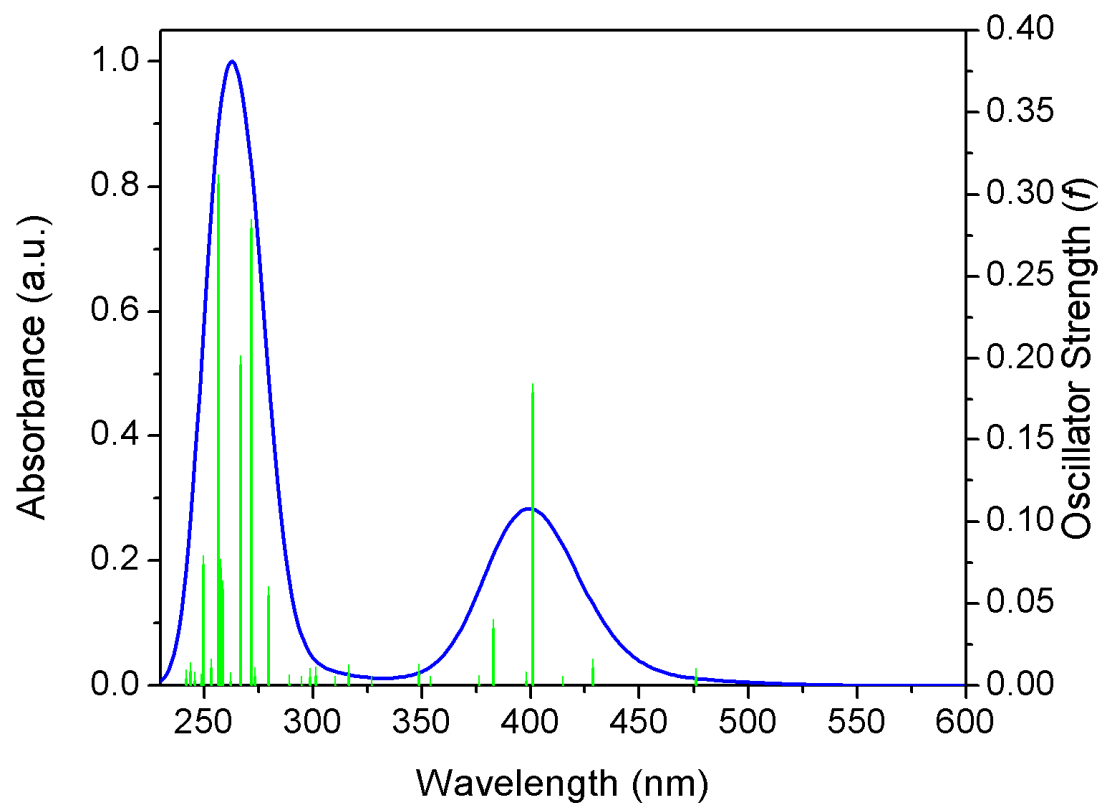



**Table S9: Complex 2, selected singlet transitions**

| <b>No.</b> | <b>Energy (eV)</b> | <b><math>\lambda</math> (nm)</b> | <b>Osc. Strength</b> | <b>Major contribs</b>                                   |
|------------|--------------------|----------------------------------|----------------------|---------------------------------------------------------|
| 1          | 2.6043             | 476.08                           | 0.005                | HOMO->LUMO (96%)                                        |
| 2          | 2.8917             | 428.77                           | 0.0104               | H-1->LUMO (-36%),<br>HOMO->L+1 (63%)                    |
| 3          | 2.9879             | 414.95                           | 0.0                  | HOMO->L+2 (90%)                                         |
| 4          | 3.091              | 401.12                           | 0.1793               | H-1->LUMO (57%),<br>HOMO->L+1 (35%)                     |
| 5          | 3.1146             | 398.07                           | 0.0029               | H-2->LUMO (95%)                                         |
| 6          | 3.238              | 382.91                           | 0.0346               | H-1->L+1 (94%)                                          |
| 18         | 4.4342             | 279.61                           | 0.0547               | H-1->L+3 (86%)                                          |
| 20         | 4.5631             | 271.71                           | 0.2794               | H-7->LUMO (-31%),<br>H-6->LUMO (33%),<br>H-5->L+1 (13%) |
| 21         | 4.6426             | 267.06                           | 0.1963               | H-6->L+1 (61%)                                          |
| 23         | 4.7911             | 258.78                           | 0.0583               | H-8->LUMO (38%),<br>H-4->L+2 (30%)                      |
| 24         | 4.8089             | 257.82                           | 0.0712               | H-7->L+2 (-11%),<br>H-1->L+6 (51%)                      |
| 25         | 4.8321             | 256.58                           | 0.3062               | H-7->LUMO (53%),<br>H-1->L+6 (10%)                      |
| 26         | 4.8943             | 253.32                           | 0.0108               | H-8->LUMO (34%),<br>H-4->L+2 (-25%),<br>HOMO->L+4 (19%) |
| 28         | 4.9633             | 249.8                            | 0.0734               | H-5->L+2 (-22%),<br>HOMO->L+4 (59%)                     |

Figure S5: Theoretical UV-vis spectrum of 3

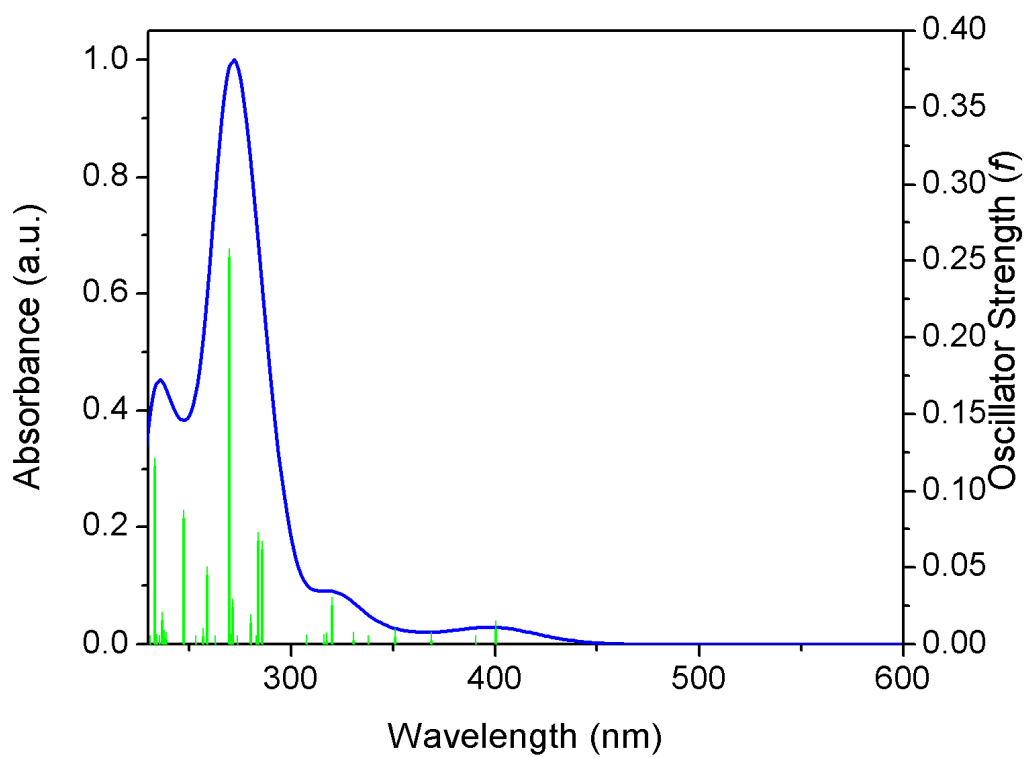

**Table S10: Complex 3, selected singlet transitions**

| No. | Energy (eV) | $\lambda$ (nm) | Osc. Strength | Major contribs                                                             |
|-----|-------------|----------------|---------------|----------------------------------------------------------------------------|
| 1   | 3.1223      | 397.09         | 0.0099A       | HOMO->LUMO (43%),<br>HOMO->L+1 (46%)                                       |
| 2   | 3.1654      | 391.68         | 0.0001        | H-1->LUMO (40%),<br>H-1->L+1 (53%)                                         |
| 3   | 3.5748      | 346.83         | 0.0021        | H-2->LUMO (37%),<br>H-2->L+1 (50%)                                         |
| 4   | 3.5777      | 346.55         | 0.0043        | HOMO->LUMO (53%),<br>HOMO->L+1 (-45%)                                      |
| 5   | 3.7121      | 334.0          | 0.0005        | HOMO->L+2 (87%)                                                            |
| 7   | 3.8848      | 319.15         | 0.026         | H-1->L+2 (98%)                                                             |
| 11  | 4.3356      | 285.97         | 0.129         | H-3->LUMO (25%),<br>H-3->L+1 (43%)                                         |
| 13  | 4.4197      | 280.52         | 0.0248        | H-3->LUMO (50%),<br>H-3->L+1 (-16%),<br>HOMO->L+3 (31%)                    |
| 18  | 4.7005      | 263.77         | 0.2771        | H-4->LUMO (54%),<br>H-4->L+1 (-38%)                                        |
| 21  | 5.0252      | 246.73         | 0.0424        | H-2->L+4 (96%)                                                             |
| 23  | 5.0422      | 245.89         | 0.0614        | H-8->LUMO (25%),<br>H-8->L+1 (27%)                                         |
| 26  | 5.2676      | 235.37         | 0.02          | H-6->L+2 (-10%),<br>H-5->LUMO (-18%),<br>H-4->L+3 (51%),                   |
| 29  | 5.3281      | 232.7          | 0.1156        | HOMO->L+5 (68%)                                                            |
| 31  | 5.4011      | 229.55         | 0.0156        | H-5->LUMO (35%),<br>H-5->L+1 (52%)                                         |
| 32  | 5.4121      | 229.09         | 0.0011        | H-7->LUMO (33%),<br>H-6->L+1 (26%),<br>H-1->L+5 (17%),<br>HOMO->L+6 (-11%) |

Figure S6: Orbital Energy Diagram for complexes 1–6.

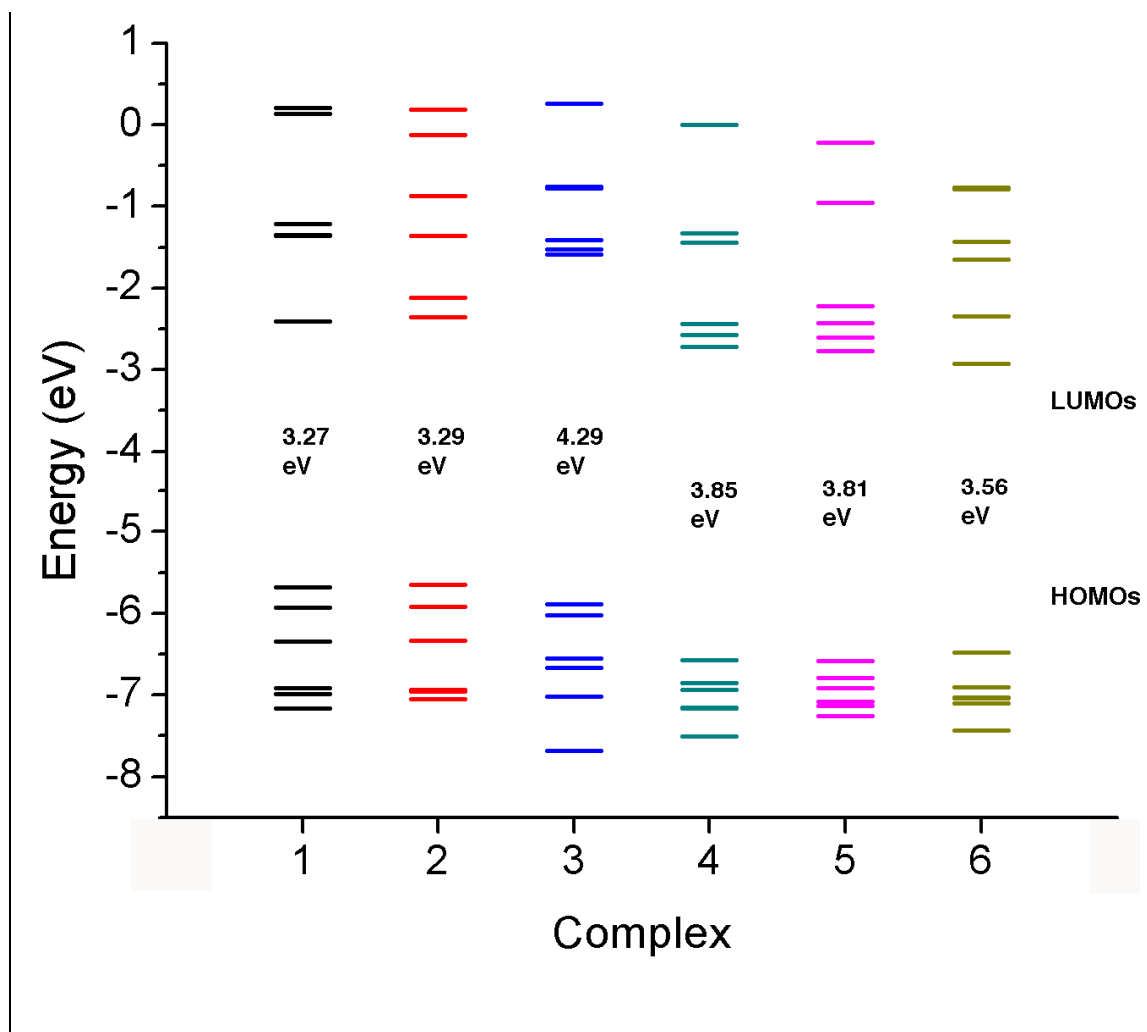

## ADF Calculations

**Table S11. Experimental and calculated absorption properties of 4**

| $\lambda_{\max}$ , nm<br>$\epsilon$ ( $M^{-1}$<br>$cm^{-1}$ ) | Tr <sup>a</sup> | Composition                                                         | Energy,<br>eV (nm) | Oscillator<br>Strength | Assignment          |
|---------------------------------------------------------------|-----------------|---------------------------------------------------------------------|--------------------|------------------------|---------------------|
| ~350                                                          | 25              | HOMO-9→LUMO (91%)<br>HOMO-4→LUMO+2 (6%)                             | 3.48(361)          | 0.0052                 | LLCT/LMCT           |
| 304<br>(11402)<br>and<br>315<br>(9756)                        | 35              | HOMO-8→LUMO (41%)<br>HOMO-7→LUMO (17%)<br>HOMO-10→LUMO (15%)        | 3.92 (316)         | 0.0746                 | LLCT/MLCT           |
|                                                               | 40              | HOMO-10→LUMO (38%)<br>HOMO-8→LUMO+1 (25%)<br>HOMO-7→LUMO+1<br>(25%) | 4.10 (303)         | 0.0170                 | MLCT/LMCT<br>/LLCT  |
|                                                               | 41              | HOMO-8→LUMO+1 (64%)<br>HOMO-10→LUMO<br>(20%)                        | 4.12 (301)         | 0.0266                 | MLCT/LMCT<br>/LLCT  |
|                                                               | 42              | HOMO-9→LUMO+1 (58%)<br>HOMO-8→LUMO+2 (23%)                          | 4.17(297)          | 0.0165                 | LMCT/LLCT           |
| 250<br>(19102)                                                | 43              | HOMO-1→LUMO+5 (99%)                                                 | 4.18(297)          | 0.0020                 | LLCT                |
|                                                               | 44              | HOMO-7→LUMO+2 (40%)<br>HOMO-9→LUMO+1 (29%)<br>HOMO-8→LUMO+2 (29%)   | 4.32 (297)         | 0.0025                 | LMCT/LLCT           |
|                                                               | 45              | HOMO-4→LUMO+1 (35%)<br>HOMO-7→LUMO+1 (14%)<br>HOMO-6→LUMO+2 (13%)   | 4.22 (294)         | 0.1730                 | LLCT/LMCT           |
|                                                               | 46              | HOMO-7→LUMO+3 (69%)<br>HOMO-8→LUMO+3 (31%)                          | 4.24 (292)         | 0.0014                 | LLCT                |
|                                                               | 47              | HOMO-9→LUMO+3 (97%)                                                 | 4.35 (285)         | 0.0027                 | LLCT                |
|                                                               | 48              | HOMO-7→LUMO+4 (46%)<br>HOMO-8→LUMO+4 (16%)<br>HOMO-5→LUMO+1 (12%)   | 4.39 (282)         | 0.0979                 | LLCT/LMCT           |
|                                                               | 49              | HOMO-7→LUMO+4 (25%)<br>HOMO-5→LUMO+1 (20%)                          | 4.40 (282)         | 0.1697                 | LLCT/LMCT/<br>MLCT/ |

|  |    |                     |            |        |      |
|--|----|---------------------|------------|--------|------|
|  |    | HOMO-6→LUMO+1 (13%) |            |        | MMCT |
|  |    | HOMO-8→LUMO+4 (13%) |            |        |      |
|  | 50 | HOMO-9→LUMO+4 (94%) | 4.51 (275) | 0.0098 | LLCT |

<sup>a</sup>Tr = transition number as obtained in the TDDFT calculation output.

**Figure S7: Complex 4, LUMO**

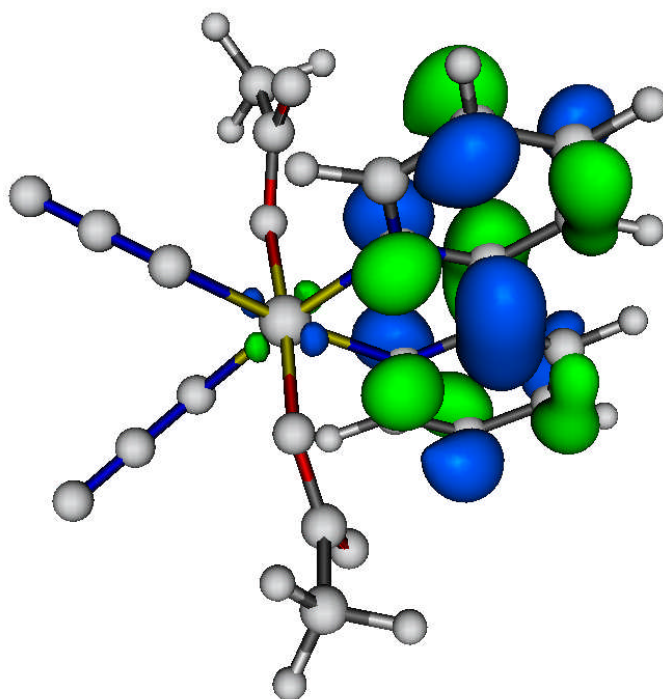

**Figure S8: Complex 4, LUMO+1**

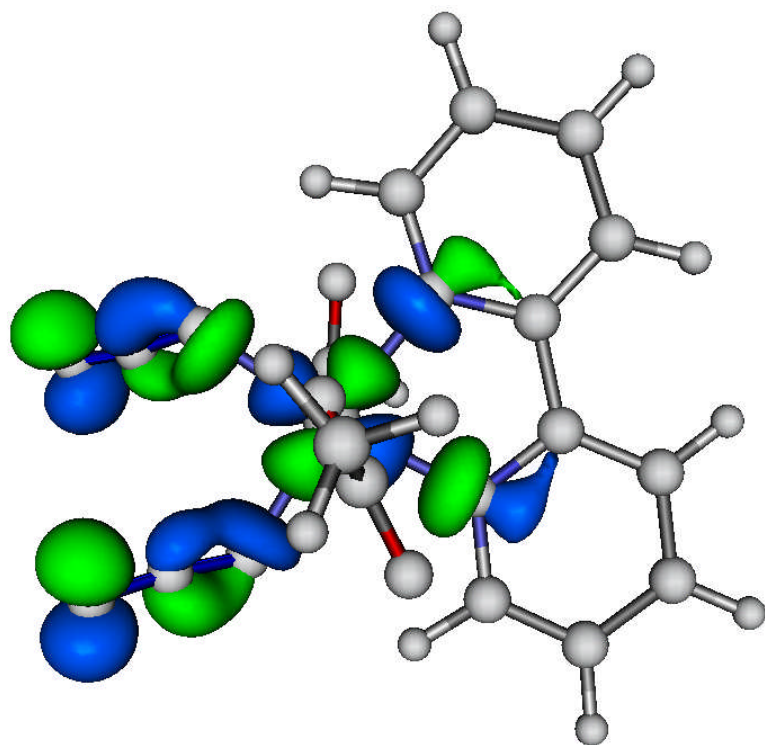

**Figure S9: Complex 4, LUMO+2**

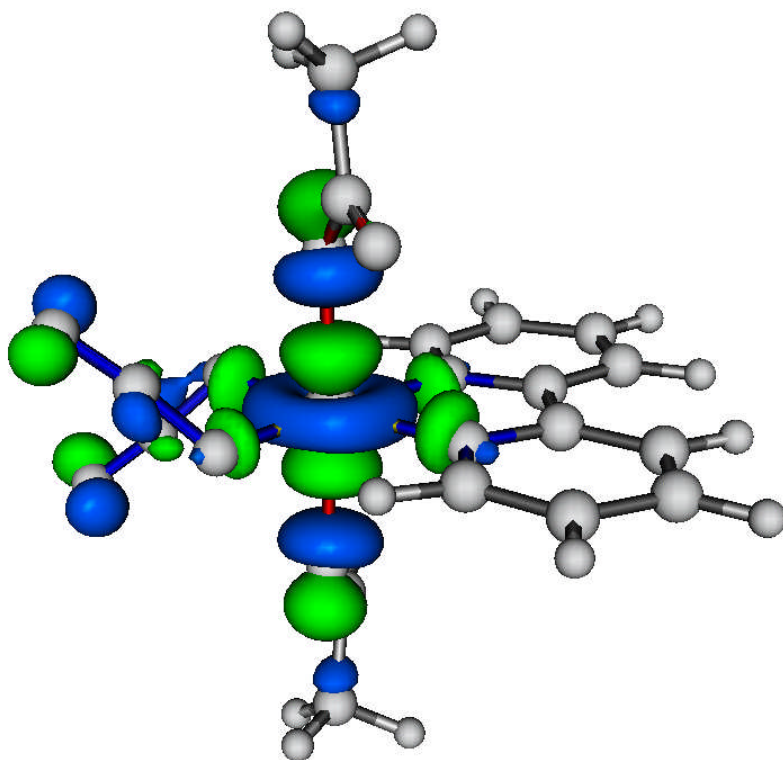

**Figure S10: Complex 4, HOMO**

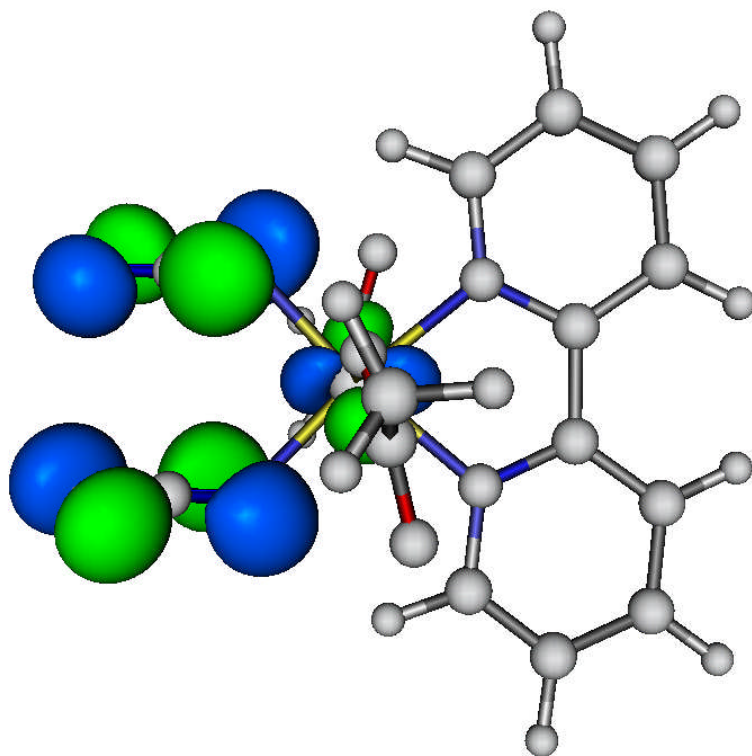

---

(1) W. B. Connick, L. M. Henling, R. E. Marsh and H. B. Gray, *Inorg. Chem.*, 1996, **35**, 6261–6265.

(2) V. M. Miskowski and V. H. Houlding, *Inorg. Chem.*, 1989, **28**, 1529–1533 and references therein.

(3) R. J. Blau, and J. H. Espenson, *Inorg. Chem.*, 1986, **25**, 878–880.
